# Supplementary material for: Insights into the structural and mechanistic basis of multifunctional S. cerevisiae Pif1p helicase
Source: PubMed Central journal article supplement — Nucleic Acids Res. 2017 Nov 30;46(3):1486–500. doi: 10.1093/nar/gkx1217 (PMC5814829; doi:10.1093/nar/gkx1217), 2017-11-30
Supplement: gkx1217_supp.pdf [file gkx1217_supp.pdf]

## Supplementary Materials

### Supplementary Figure Legends

**Figure S1.** Structure-based sequence alignments of ScPif1p, BsPif1 and human Pif1. The secondary structure elements of ScPif1p are shown above the sequence, as cylinders (for  $\alpha$ - and  $\eta$ -helices) and arrows (for  $\beta$ -strands). The domain sequences are colored according to the color scheme in Figure 1A and labeled sequentially within each domain. The highly conserved residues are boxed. Only amino acid sequences corresponding to the nuclear-form ScPif1p (aa 40–859) are shown for comparison.

**Figure S2.** Purifications and characterizations of ScPif1p. **(A)** Coomassie Blue-stained 10% SDS-polyacrylamide gel of purified truncated (aa 237–780) ScPif1p loaded with 20 (lane 1), 4 (lane 2), and 1  $\mu$ g (lane 3). The molecular-mass standards (lane 4) (in kDa) are shown on the right. **(B)** Unwinding kinetics of the full-length nuclear form (aa 40–859) and the truncated (aa 237–780) ScPif1p proteins. The assays were performed with 4 nM fluorescently labeled partial duplex DNA ( $S_{26}ds_{17}$ ) and 100 nM proteins as described under “Materials and Methods”. The plots shown are representative of three independent experiments. **(C)** Size exclusion chromatography analysis of ScPif1p by Superdex 200 10/300 GL. The protein molecular standards are indicated above the elution curve. The apparent molecular weight of ScPif1p is 63 kDa, in accordance with a monomeric protein. **(D–F)** Radius distributions of ScPif1p (D), ScPif1p in complex with ssDNA (Poly(T<sub>11</sub>)) (E) and with partial dsDNA (8T11bp) (F), obtained from analyses of experimental data in DLS assays. The experiments were carried out as described under “Materials and Methods”. The determined hydrodynamic radii are between 3.98–4.11 nm, corresponding to a monomeric ScPif1p with *M*w of ~63 kDa.

**Figure S3.** Crystal packing of ScPif1p and identification of the dimers. **(A)** Crystal of ScPif1p in P212121 space group contains two molecules in the asymmetric unit. The two distinct molecules are colored in cyan (molecule A) and green (molecule B) in the whole unit cell of the crystal. **(B)** In the same P212121 unit cell, the non-crystallographic relationships between the molecules are highlighted. The translational non-crystallographic symmetry is shown between molecule B in light blue and molecule A in cyan. Several dimers can be isolated in the unit cell: dimer 1 (pair cyan/green), dimer 2 (pair cyan/blue), dimer 3 (pair cyan/pink) and dimer 4 pair (cyan/yellow). **(C)** P3121 crystals contain two ScPif1p molecules (colored green and cyan) in the asymmetric

unit. The two molecules in cyan are related by a two-fold crystallographic symmetry and correspond to the dimer 2 in the P212121 unit cell.

**Figure S4.** Comparison of nucleotide binding sites in human Pif1 and ScPif1p. **(A)** Structure of the nucleotide binding site in human Pif1 (PDB entry 5FHH). The structure was refined to  $R/R_{\text{free}} = 32.9/36.9$ . The electron density calculated from the deposited Structure Factors is contoured at 1.2. The orientation is the same as that in Figure 1E. **(B)** After refinement of human Pif1 with  $R/R_{\text{free}} = 27.5/34.1$ , the spatial position of ADP·AlF<sub>4</sub> ligand undergoes a significant change which is equivalent to the position of ADP·AlF<sub>4</sub> ligand in ScPif1p. The resulting electron density map is contoured at 1.2. **(C)** Overlay of nucleotide binding sites of human Pif1 and ScPif1p. Human Pif1 and ScPif1p Ca backbones superimpose with r.m.s.d of 2.0 Å. 5FHH is shown in pink, refined human Pif1 in cyan and ScPif1p in green. The ligand ADP·AlF<sub>4</sub> is shown as sticks and the magnesium ion as a sphere. **(D)** Stopped-flow DNA unwinding curves for ScPif1p variant Q241A with different NTPs, which are used to determine the DNA unwinding amplitude and rate of the variant. The assays were performed with 200 nM mutant Q241A, 4 nM fluorescently labeled partial duplex DNA under experimental conditions as described in “Materials and Methods”.

**Figure S5.** **(A)** Superimposition of domain 2C of ScPif1p (aa 542–651) in yellow on RecB (aa 607–647) in pink. **(B)** Details of the cryoEM structure of RecBCD (PDB entry 5LD2), only RecB and RecD are shown. **(C)** ScPif1p is in the same orientation as RecD in (B). Domain 1A of RecD and that of ScPif1p have been superimposed in order to have the best fit for ssDNA complexed in both molecules. **(D)** Superimposition of ScPif1p on the RecBCD structure. Domain 2C of ScPif1p superimposes on RecB (the analogous structural domain is shown in pink).

**Figure S6.** SEC-SAXS profiles of all data collected, processed with HPLC-SAXS module of US-SOMO. During elution, SAXS data  $I(q)$  are collected during time  $t$ .  $I(q, t)$  are transformed as  $I(t, q)$ . The ‘experimental’ SAXS curve  $I(t, q)$  recorded at the lowest  $q$  value (0.006) is shown. Deconvoluted peaks from Gaussian approximations are indicated in different colors and the calculated Radius of gyration are plotted. In the lower panels the absorbances at 260 and 280 nm are indicated on the same time scale. Profiles for 3G4 and 8T3G4 are shown in **(A)** and **(B)**, respectively. Profiles for apo ScPif1p, ScPif1p in complex with ssDNA (GR<sub>11</sub>) in the presence of ADP·AlF<sub>4</sub>, or with 8T3G4, 3G4 and 8T11bp, are shown in C, D, E, F and G, respectively.

**Figure S7.** Normalized Kratky plots and pair distance distribution functions showing comparison of apo ScPif1p and ScPif1p-ssDNA (GR<sub>11</sub>) complex **(A and B)**, and of G-quadruplexes 3G4 and 8T3G4 **(C and D)**.

**Figure S8.** Ensemble Optimization Method (EOM) calculation for 10000 models of apo ScPif1p and ScPif1p-ssDNA (GR<sub>11</sub>) complex. Flexibility has been introduced between the 2B + 2C domain and the rest of the protein. Distribution of  $R_g$  and  $D_{max}$  for the pool (red) and ensemble (green) are given for apo ScPif1p (A and B) and for the complex (C and D). For the apo protein, the distributions show an ensemble with at least two populations which are reduced to a single population for the complex.

**Figure S9.** Summary of calculated fits of models to SAXS experimental data. For clarity, the models are shown in surface representations with colors according to the color scheme in Figure 1. The DNAs are shown in green, light green and dark green bound to each monomer in the dimers model. The residuals are calculated as experimental intensity divided by computed intensity. The models tested and the corresponding fits are shown for apo-ScPif1p (A), ScPif1p-ssDNA (GR<sub>11</sub>) complex (B), 3G4 (C), 8T3G4 (D), ScPif1p-8T3G4 complex (E), Dimer1-8T3G4 complex (F), Dimer2-8T3G4 complex (G), Dimer3-8T3G4 complex (H), Dimer4-8T3G4 complex (I), Dimer2-3G4 complex (J), ScPif1p-8T11bp complex (K) and Dimer2-8T11bp complex (L). For dimers, several stoichiometry hypothesis have been tested and are indicated as protein:DNA ratio after the dimer name. The comparisons of experimental and model data are presented in Table S4.

**Figure S10.** (A) Anisotropy-based DNA binding isotherms of ScPif1p with ssDNA Poly(T<sub>12</sub>), dsDNA (dsDNA<sub>16bp</sub>), and F-G<sub>417</sub>. The binding curve of variant DM F-G<sub>417</sub> is also determined under the same experimental conditions. The insert is an enlarged show of cooperative and non cooperative binding curve for wild-type ScPif1p and DM, respectively. The solid lines represent the best fits of the data with Equation 1 for ss- and dsDNA, or with the Hill equation for ScPif1p in complex with F-G<sub>417</sub> ( $H_n = 2.08 \pm 0.1$ ). (B) Gel filtration analysis of apo ScPif1p (green line) and ScPif1p in complex with ssDNA Poly(T<sub>22</sub>) (blue line) and 8T3G4 (red line), respectively. DM mutant in complex with 8T3G4 (black line) was also analyzed under the same experimental conditions. The elution profiles were recorded from a Superdex 200 column (GE Healthcare) at a protein concentration of 10 mg/ml. Molecular weights used for the calibration are indicated on the top axis.

Figure S1

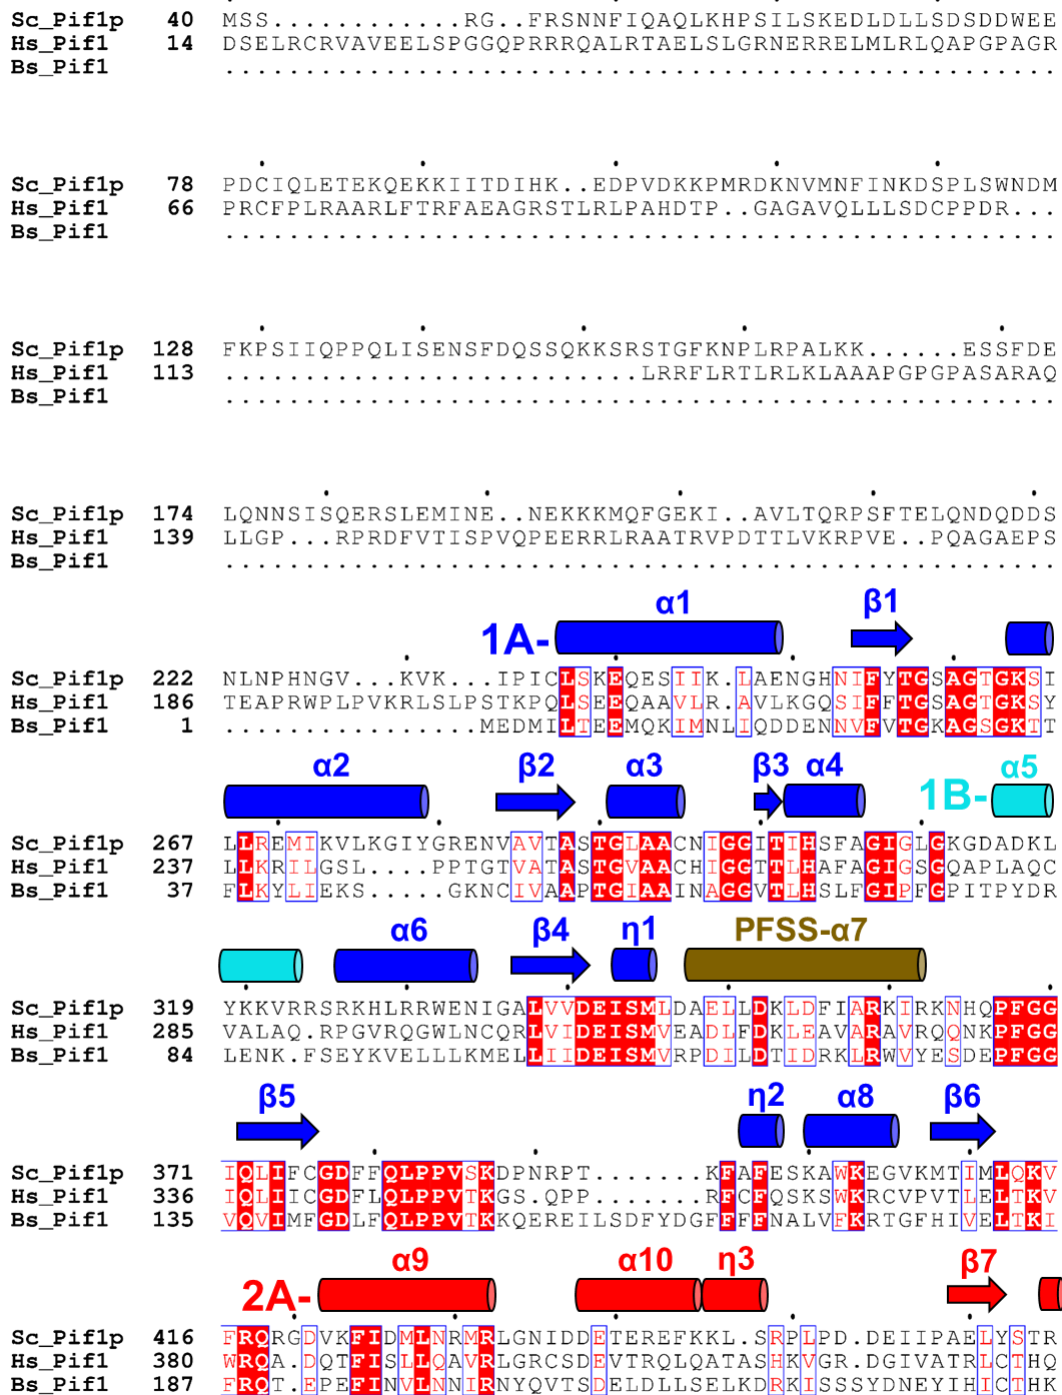

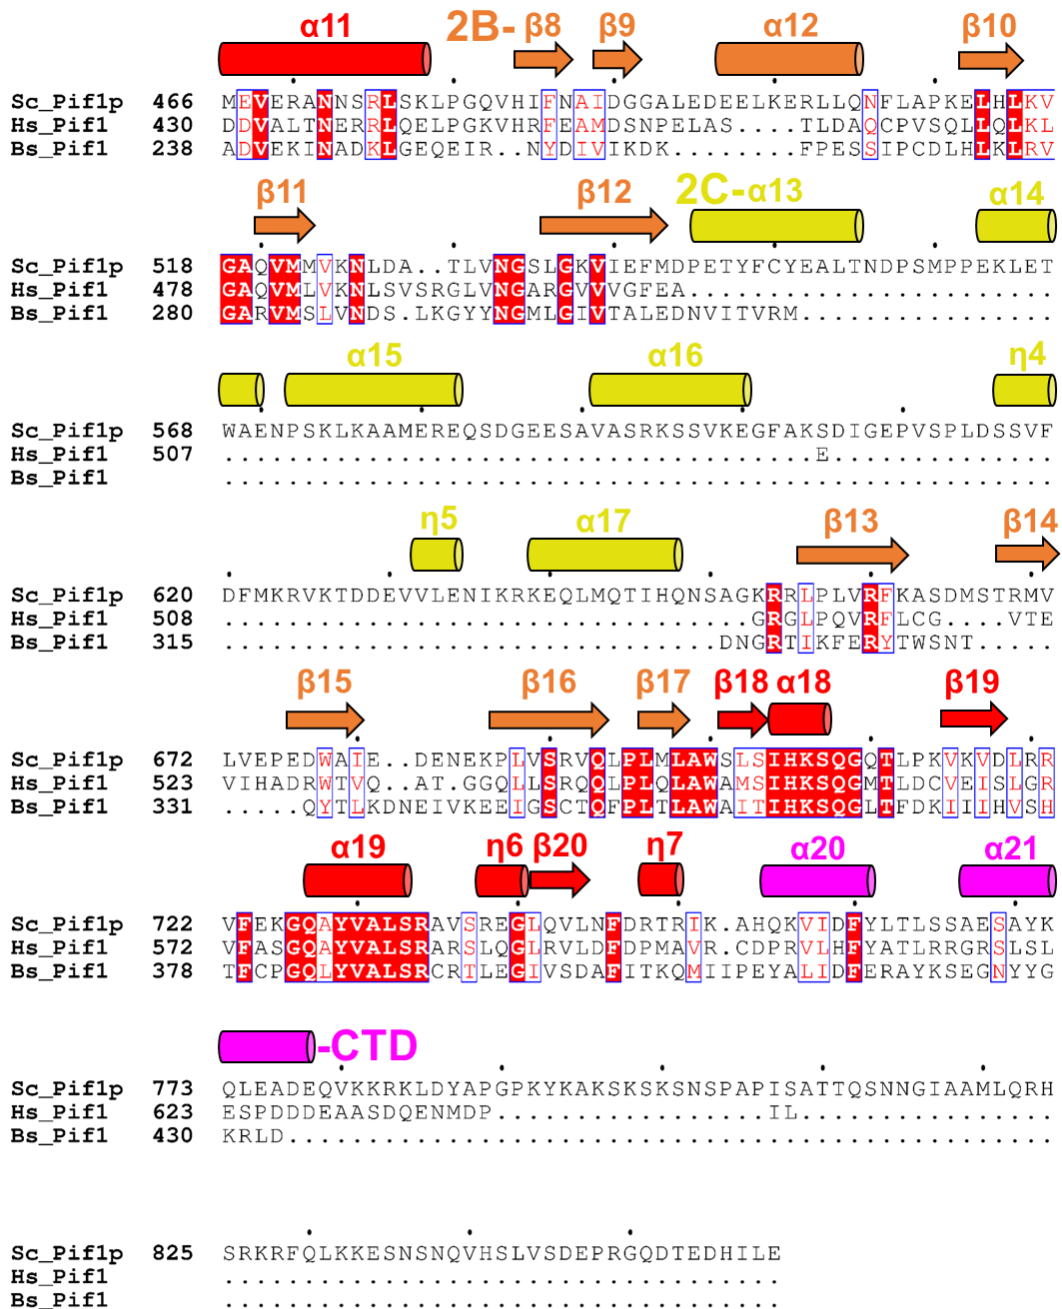

Figure S2

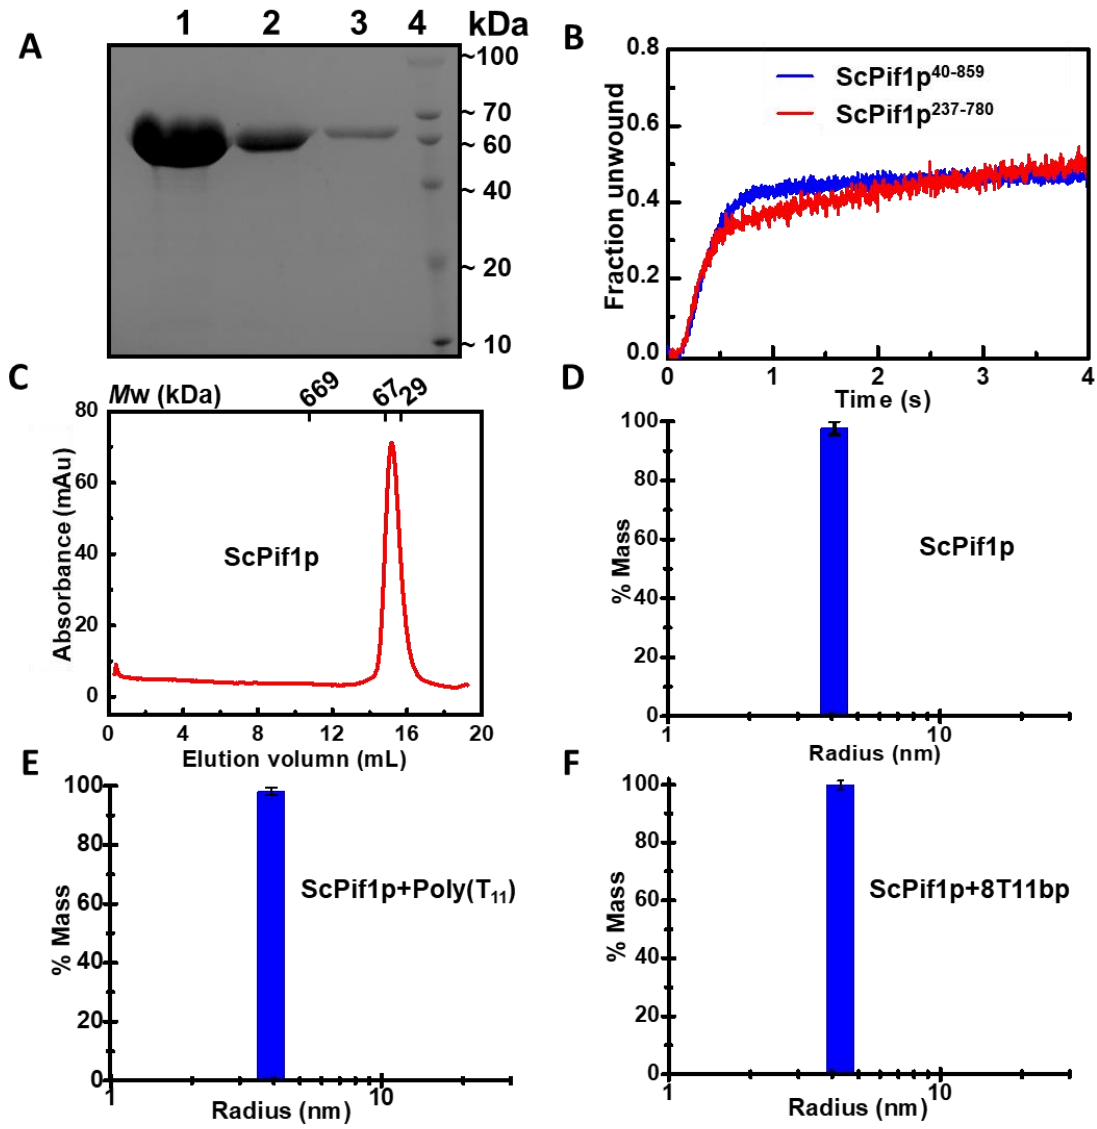

Figure S3

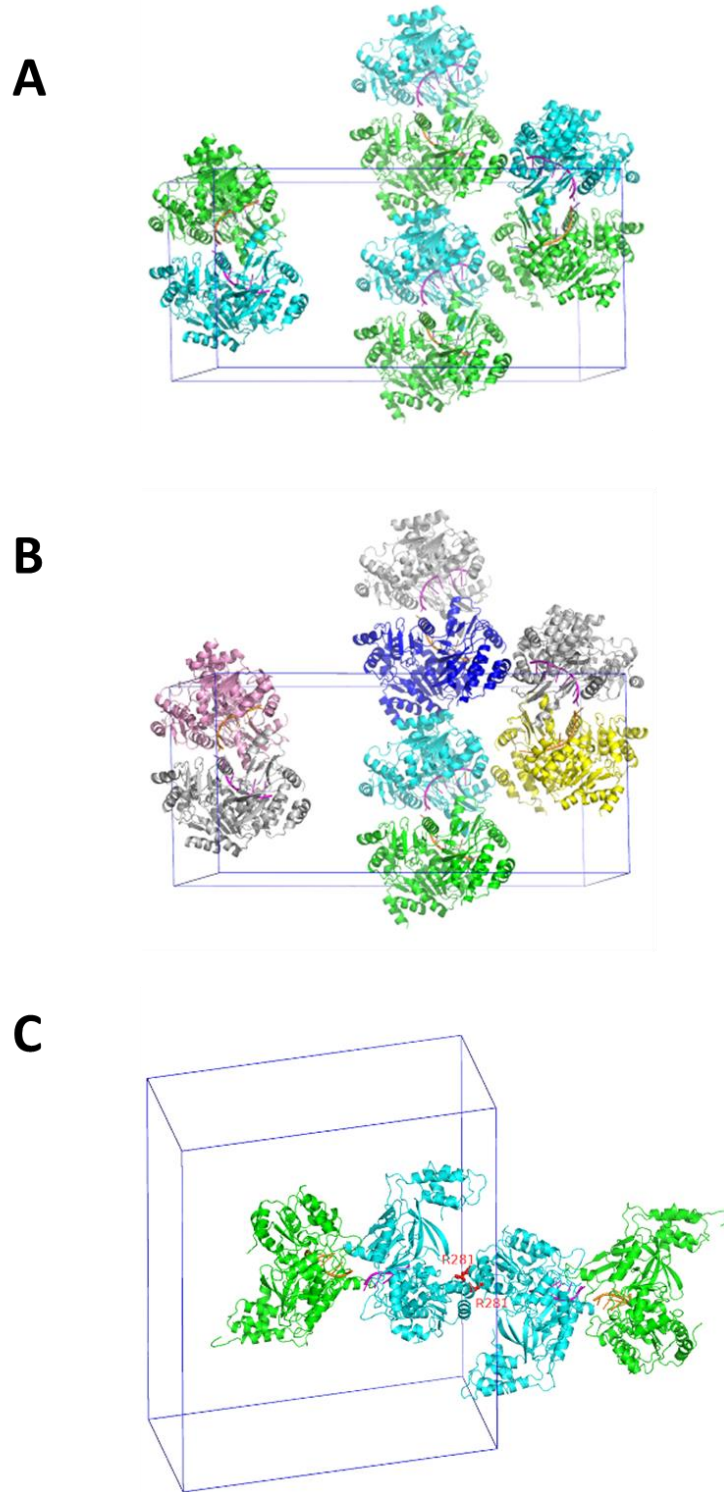

Figure S4

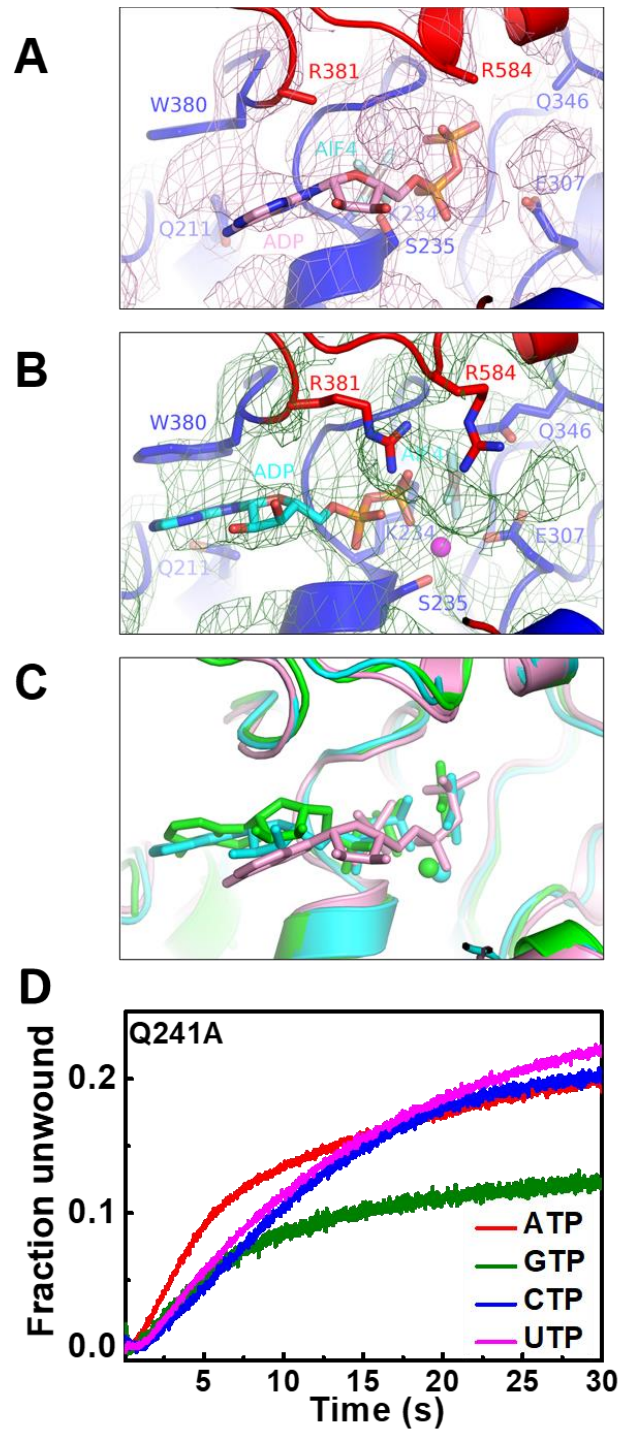



Figure S5

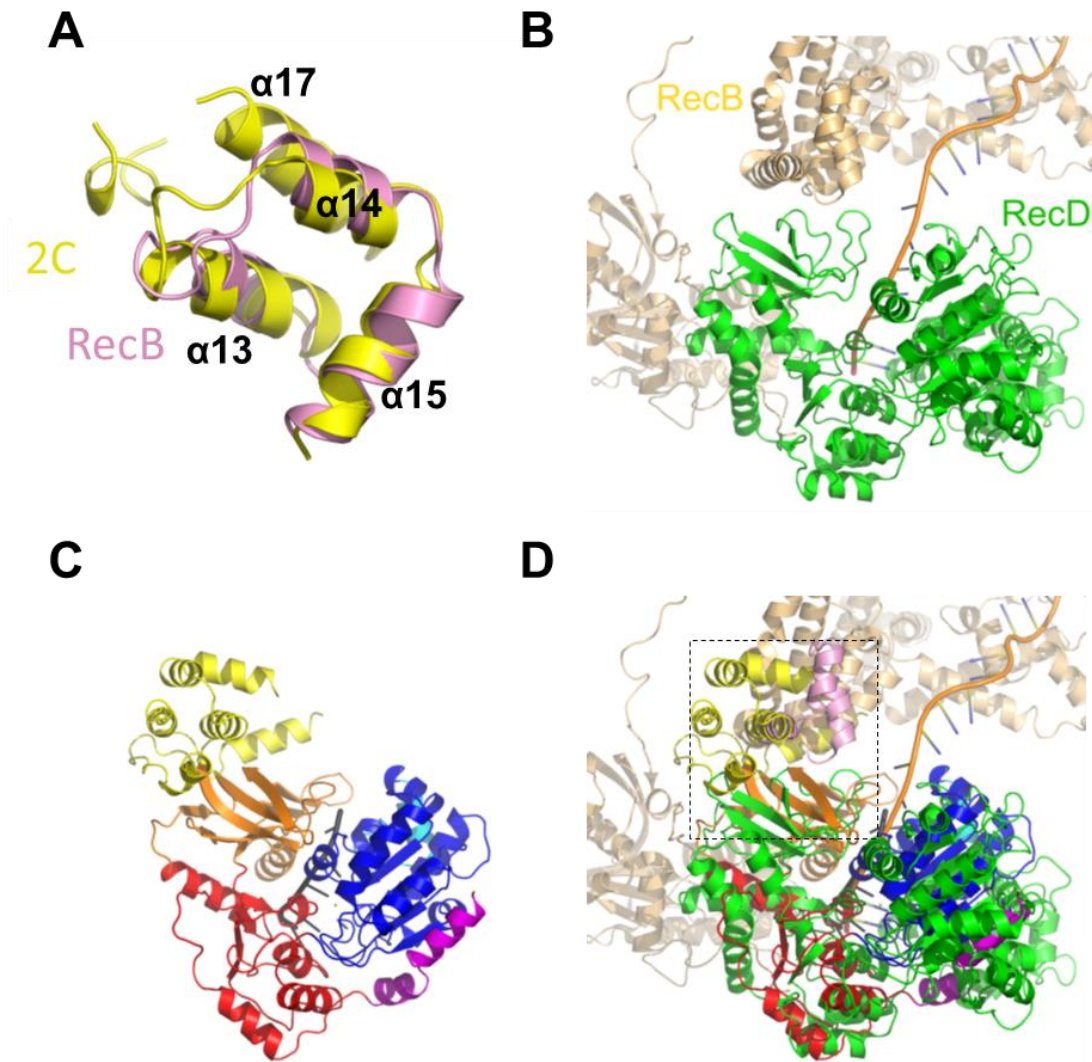

Figure S6

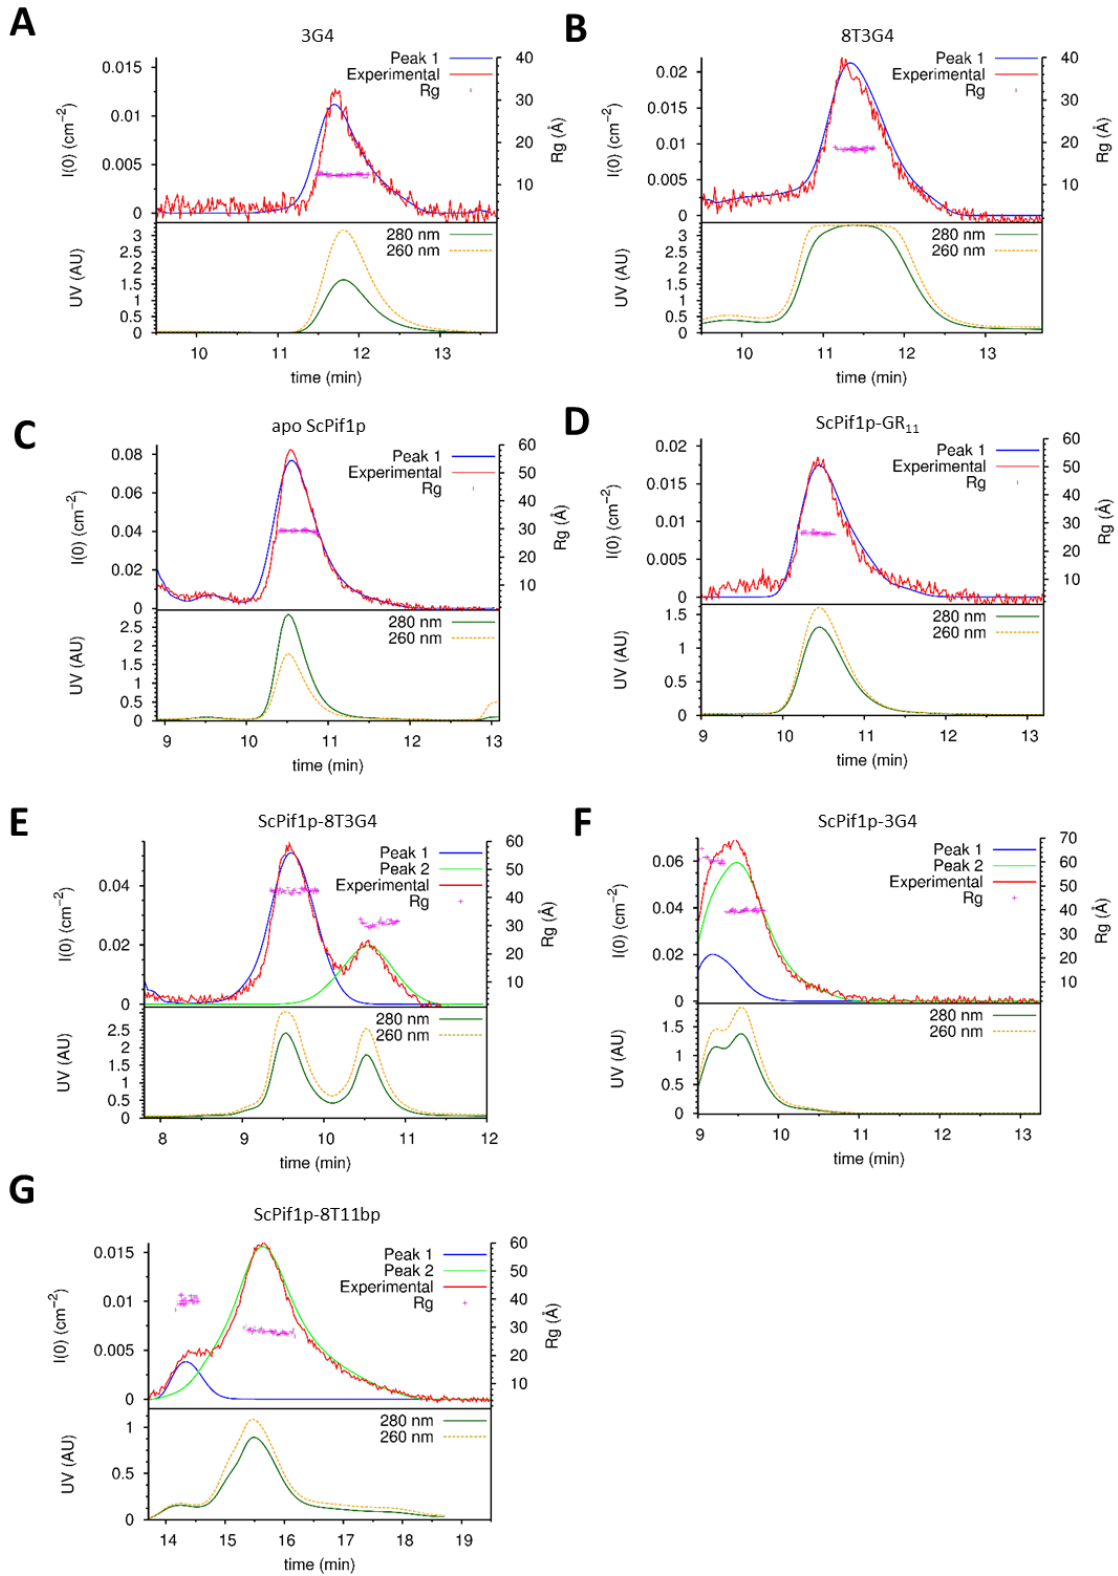

Figure S7

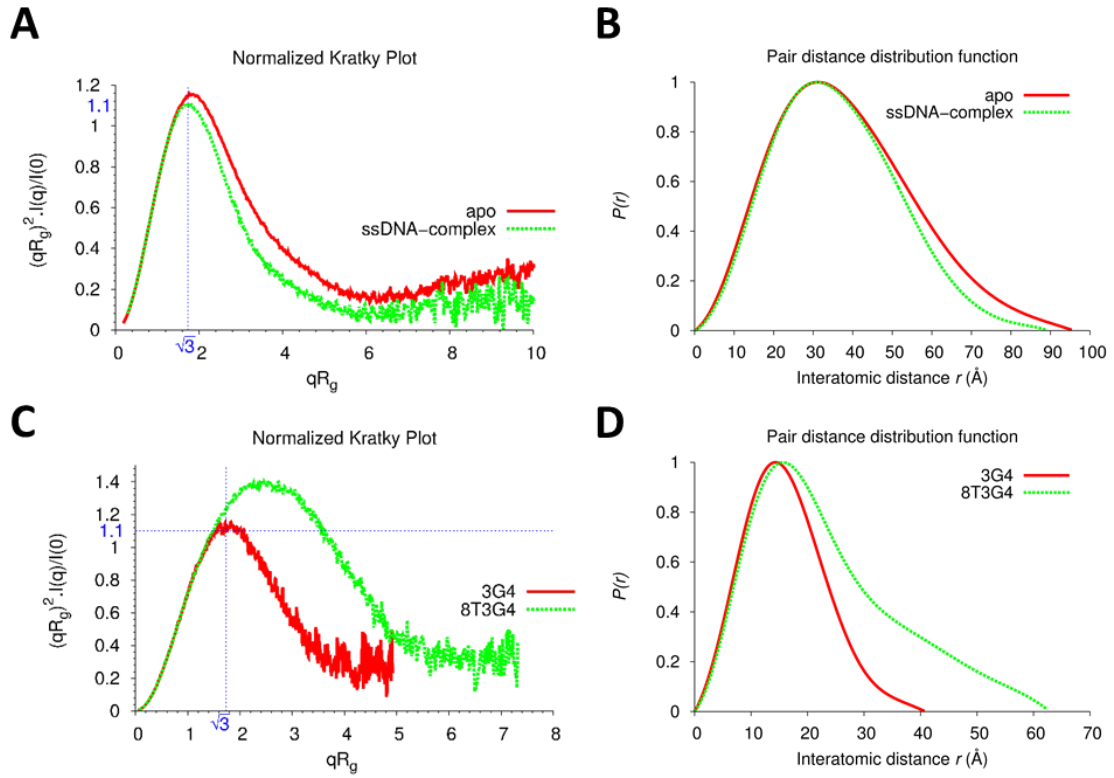

Figure S8

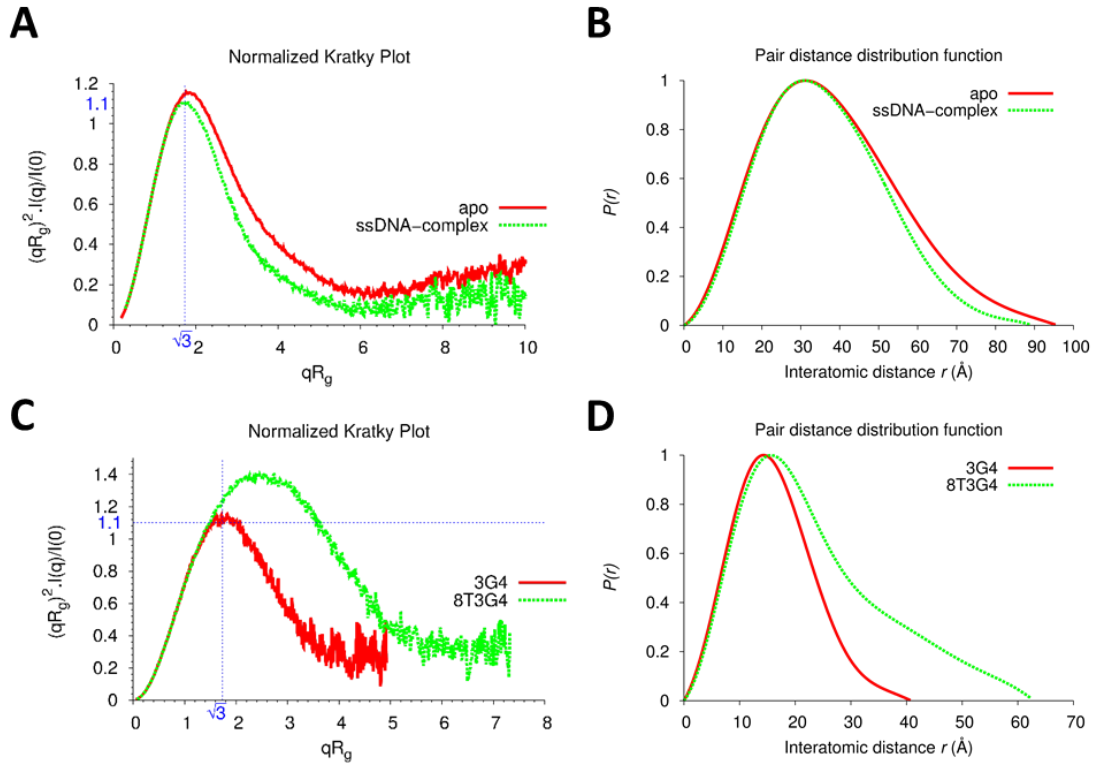

Figure S9

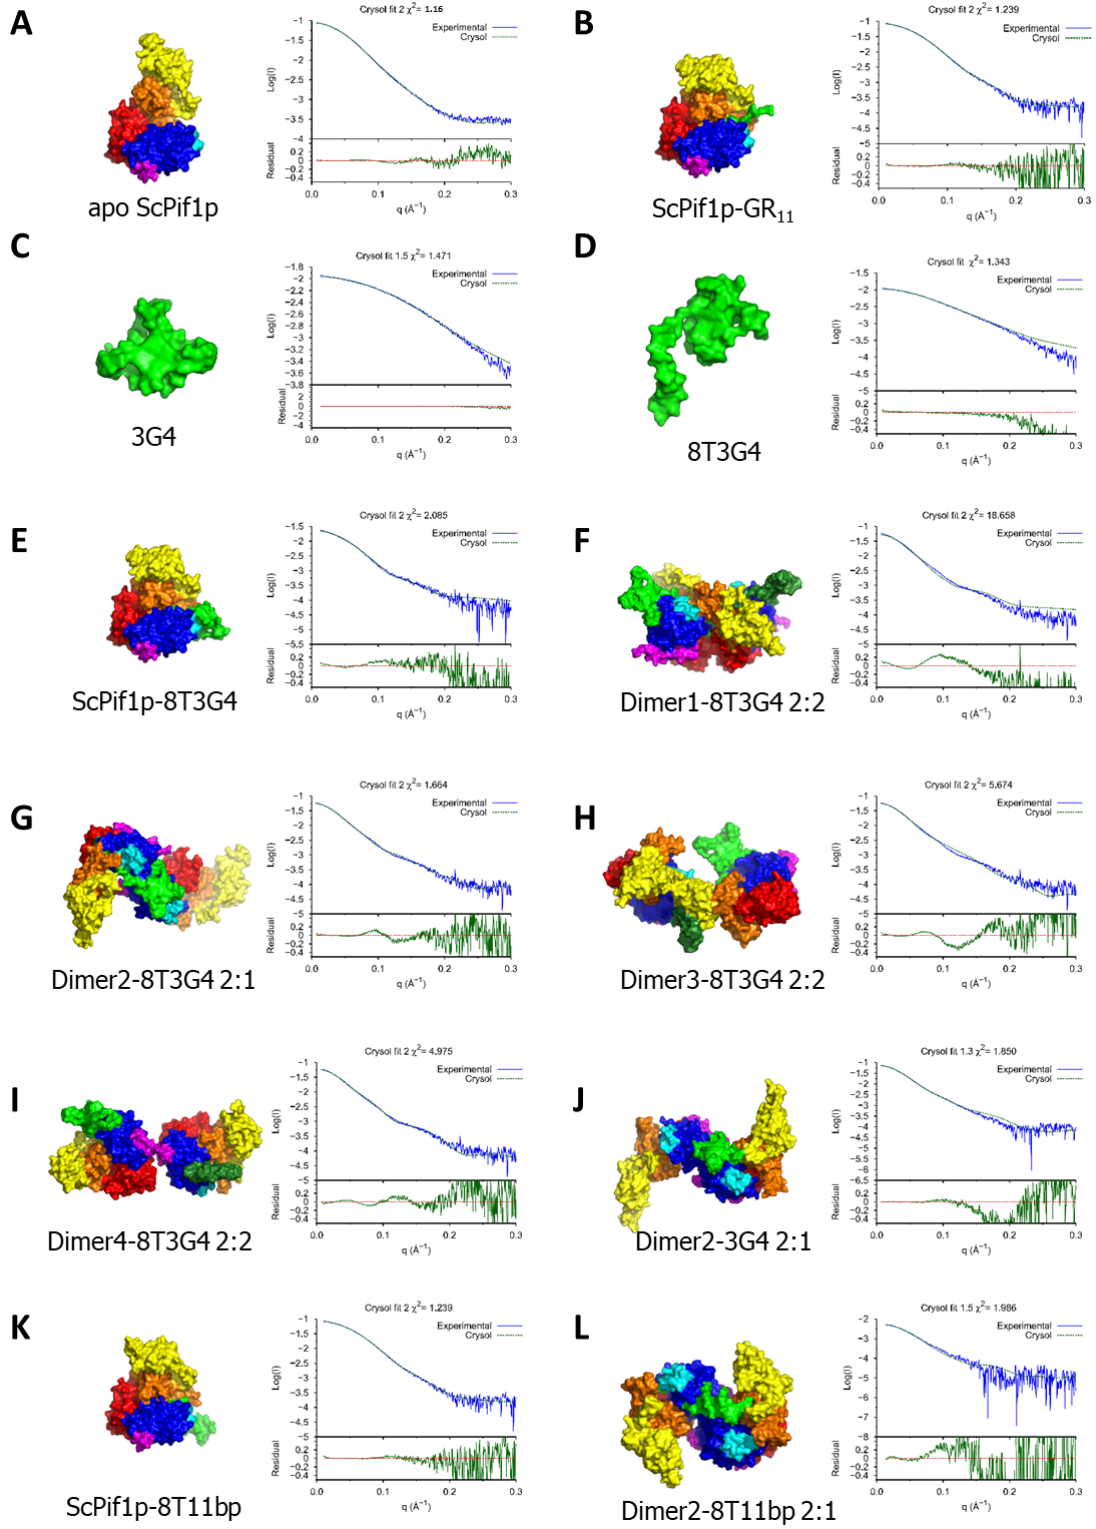

Figure S10

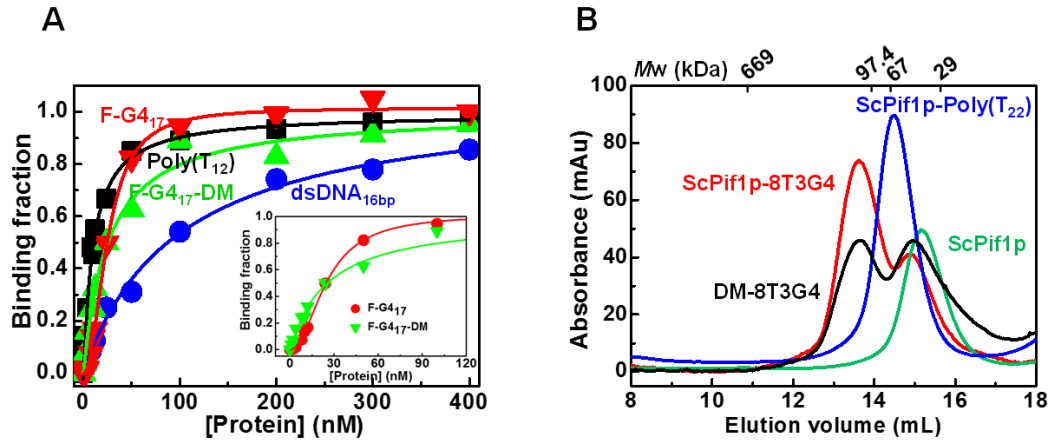

**Table S1.** DNA substrates used in various assays

| Assay               | Substrate                                           | Sequence (5'–3')                                                                                                 |
|---------------------|-----------------------------------------------------|------------------------------------------------------------------------------------------------------------------|
| Crystal             | Poly(T <sub>8</sub> )                               | TTTTTTTTT                                                                                                        |
|                     | Poly(G <sub>3</sub> T <sub>5</sub> )                | GGGTTTTTT                                                                                                        |
|                     | Poly(T <sub>3</sub> G <sub>3</sub> T <sub>2</sub> ) | TTTGGGTT                                                                                                         |
| Unwinding           | S <sub>26</sub> ds <sub>17</sub>                    | (dT <sub>26</sub> )ATGTATGTCAAGGAAGG-F <sup>a</sup><br>H <sup>b</sup> -CCTTCCTTGACATACAT                         |
|                     | S <sub>26</sub> G <sub>4</sub> ds <sub>17</sub>     | (dT <sub>26</sub> ) (GGGTTA) <sub>3</sub> GGGATGTATGTCAAGGAAGG-F<br>H-CCTTCCTTGACATACAT                          |
| Translocation       | Poly(T <sub>54</sub> )                              | dT <sub>54</sub> -Cy3                                                                                            |
|                     | Protein trap                                        | dT <sub>56</sub>                                                                                                 |
| smFRET <sup>c</sup> | smS <sub>26</sub> G <sub>4</sub> ds <sub>17</sub>   | AAGCAGTGGTATCAACGCAGAGAAAT(iCy3)<br>(GGGTTA) <sub>3</sub> GGGATGTATGACAAGGAAGG<br>Biotin-CCTTCCTTGTCAT(iCy5)ACAT |
|                     | smS <sub>47</sub> ds <sub>17</sub>                  | Cy3-(dT <sub>47</sub> )ATGTATGACAAGGAAGG<br>Biotin-CCTTCCTTGTCAT(iCy5)ACAT                                       |
| Binding             | Poly(T <sub>12</sub> )                              | F-TTTTTTTTTTTTT                                                                                                  |
|                     | GR <sub>12</sub>                                    | F-GTGTGTGTGGTG                                                                                                   |
|                     | F-RNA <sub>12</sub>                                 | F-CUCUGCUCGACG                                                                                                   |
|                     | F-G <sub>4</sub> <sub>17</sub>                      | F-AGGGTGGGTGGGTGGGT                                                                                              |
|                     | dsDNA <sub>16bp</sub>                               | F-CTCTGCTCGACGGATT<br>AATCCGTCGAGCAGAG                                                                           |
| SAXS                | GR <sub>11</sub>                                    | GTGTGGTGTGG                                                                                                      |
|                     | 8T11bp                                              | TTTTTTTTTCGCAGTGCTCG<br>CGAGCACTGCG                                                                              |
|                     | 3G4                                                 | AGGGTTAGGGTTAGGGTTAGGG                                                                                           |
|                     | 8T3G4                                               | TTTTTTTTTGGGTGGGTGGGTGGGT                                                                                        |
| DLS                 | Poly(T <sub>11</sub> )                              | TTTTTTTTTTT                                                                                                      |
|                     | 8T11bp                                              | TTTTTTTTTCGCAGTGCTCG<br>CGAGCACTGCG                                                                              |
|                     | 8T3G4                                               | TTTTTTTTTGGGTGGGTGGGTGGGT                                                                                        |

<sup>a</sup> F, fluorescein.<sup>b</sup> H, hexachlorofluorescein.<sup>c</sup> Single-molecule fluorescence resonance energy transfer.

**Table S2.** Data collection and refinement statistics

|                                | ScPif1p SAD*<br>Poly(T <sub>8</sub> )-<br>ADP·AIF <sub>4</sub> | ScPif1p-<br>Poly(G <sub>3</sub> T <sub>5</sub> )-<br>ADP·AIF <sub>4</sub> | ScPif1p-<br>Poly(T <sub>3</sub> G <sub>3</sub> T <sub>2</sub> )-<br>ADP·AIF <sub>4</sub> | ScPif1p-<br>Poly(T <sub>8</sub> )-<br>ATP <sub>γ</sub> S |
|--------------------------------|----------------------------------------------------------------|---------------------------------------------------------------------------|------------------------------------------------------------------------------------------|----------------------------------------------------------|
| <b>Data collection</b>         |                                                                |                                                                           |                                                                                          |                                                          |
| wavelength (Å)                 | 0.9791                                                         | 0.9791                                                                    | 0.9791                                                                                   | 0.9778                                                   |
| Resolution range               | 44.15–3.16<br>(3.27–3.16)                                      | 58.71–2.03<br>(2.10–2.03)                                                 | 65.21–3.34<br>(3.46–3.4)                                                                 | 65.0–3.28<br>(3.40–3.28)                                 |
| Space group                    | P 21 21 21                                                     | P 21 21 21                                                                | P 31 2 1                                                                                 | P 21 21 21                                               |
| Unit cell                      | 74.2 90.9 185.6<br>90 90 90                                    | 75.2 88.3 187.7<br>90 90 90                                               | 150.6 150.6 136.3<br>90 90 120                                                           | 74.4 90.8 186.2<br>90 90 90                              |
| Total reflections              | 254950 (25626)                                                 | 506940 (21945)                                                            | 274688 (22049)                                                                           | 116467 (12168)                                           |
| Unique reflections             | 22200 (2148)                                                   | 80210 (7015)                                                              | 25042 (2024)                                                                             | 17964 (1952)                                             |
| Multiplicity                   | 11.5 (11.7)                                                    | 6.3 (3.1)                                                                 | 11.0 (10.9)                                                                              | 6.5 (6.2)                                                |
| Completeness (%)               | 99.6 (98.4)                                                    | 98.1 (86.8)                                                               | 95.4 (79.0)                                                                              | 89.7 (99.5)                                              |
| Mean I/sigma (I)               | 13.43 (3.23)                                                   | 17.01 (2.23)                                                              | 17.23 (2.49)                                                                             | 7.62 (2.27)                                              |
| Wilson B-factor                | 67.70                                                          | 36.65                                                                     | 93.39                                                                                    | 73.08                                                    |
| R-merge                        | 0.14 (0.76)                                                    | 0.06 (0.49)                                                               | 0.17 (1.65)                                                                              | 0.16 (0.71)                                              |
| CC1/2                          | 0.99 (0.93)                                                    | 0.99 (0.74)                                                               | 0.99 (0.86)                                                                              | 0.99 (0.88)                                              |
| <b>Refinement</b>              |                                                                |                                                                           |                                                                                          |                                                          |
| Reflections used in refinement |                                                                | 80200 (7015)                                                              | 24986 (2019)                                                                             | 17898 (1951)                                             |
| Reflections used for R-free    |                                                                | 3939 (355)                                                                | 1253 (108)                                                                               | 950 (98)                                                 |
| R-work                         |                                                                | 0.19 (0.25)                                                               | 0.17 (0.30)                                                                              | 0.25 (0.32)                                              |
| R-free                         |                                                                | 0.23 (0.31)                                                               | 0.25 (0.37)                                                                              | 0.32 (0.36)                                              |
| Number of non-hydrogen atoms   |                                                                | 9104                                                                      | 8456                                                                                     | 8658                                                     |
| Protein residues               |                                                                | 1035                                                                      | 1025                                                                                     | 1054                                                     |
| RMS (bonds)                    |                                                                | 0.008                                                                     | 0.010                                                                                    | 0.003                                                    |
| RMS (angles)                   |                                                                | 0.98                                                                      | 1.38                                                                                     | 0.70                                                     |
| Ramachandran favored (%)       |                                                                | 98.8                                                                      | 95.8                                                                                     | 98.5                                                     |
| Ramachandran allowed (%)       |                                                                | 1.2                                                                       | 4.2                                                                                      | 1.5                                                      |
| Ramachandran outliers (%)      |                                                                | 0.00                                                                      | 0.00                                                                                     | 0.00                                                     |
| Rotamer outliers (%)           |                                                                | 0.45                                                                      | 0.00                                                                                     | 0.00                                                     |
| Clashscore                     |                                                                | 9.0                                                                       | 14.4                                                                                     | 11.0                                                     |
| Average B-factor               |                                                                | 54.4                                                                      | 114.7                                                                                    | 82.9                                                     |

\* Single wavelength anomalous dispersion.



**Table S3.** SAXS data collection and processing of DNA, ScPif1p and complexes

|                                                             | 3G4         | 8T3G4       | ScPif1p     | ScPif1p-GR <sub>II</sub> | ScPif1p-8T3G4<br>Peak 1 | ScPif1p-8T3G4<br>Peak 2 | ScPif1p-3G4<br>Peak 2 | ScPif1p-8T11bp<br>Peak 1 | ScPif1p-8T11bp<br>Peak 2 |
|-------------------------------------------------------------|-------------|-------------|-------------|--------------------------|-------------------------|-------------------------|-----------------------|--------------------------|--------------------------|
| <b>Data-collection parameters</b>                           |             |             |             |                          |                         |                         |                       |                          |                          |
| Instrument                                                  | SWING       | SWING       | SWING       | SWING                    | SWING                   | SWING                   | SWING                 | SWING                    | SWING                    |
| Beam geometry (mm)                                          | 0.4×0.1     | 0.4×0.1     | 0.4×0.1     | 0.4×0.1                  | 0.4×0.1                 | 0.4×0.1                 | 0.4×0.1               | 0.4×0.1                  | 0.4×0.1                  |
| Wavelength (Å)                                              | 1.03        | 1.03        | 1.03        | 1.03                     | 1.03                    | 1.03                    | 1.03                  | 1.03                     | 1.03                     |
| $q$ range (Å <sup>-1</sup> )                                | 0.007-0.3   | 0.007-0.3   | 0.007-0.3   | 0.007-0.3                | 0.007-0.3               | 0.007-0.3               | 0.007-0.3             | 0.007-0.3                | 0.007-0.3                |
| Data collection mode                                        | HPLC        | HPLC        | HPLC        | HPLC                     | HPLC                    | HPLC                    | HPLC                  | HPLC                     | HPLC                     |
| Exposure time (s) / nb frames                               | 0.75 / 20   | 0.75 / 20   | 0.75 / 20   | 0.75 / 20                | 0.75 / 20               | 0.75 / 20               | 0.75 / 20             | 1 / 20                   | 1 / 20                   |
| Concentration injected (mg.ml <sup>-1</sup> )               | 2           | 2           | 10          | 10                       | 15                      | 15                      | 10                    | 10                       | 10                       |
| Temperature                                                 | 288         | 288         | 288         | 288                      | 288                     | 288                     | 288                   | 288                      | 288                      |
| <b>Structural parameters</b>                                |             |             |             |                          |                         |                         |                       |                          |                          |
| $I(0)$ (cm <sup>-1</sup> ) [from Guinier]                   | 0.010       | 0.010       | 0.002       | 0.018                    | 0.058                   | 0.025                   | 0.074                 | 0.006                    | 0.015                    |
| $R_g$ (Å) [from Guinier]                                    | 12.3 ± 0.2  | 18.2 ± 0.2  | 29.3 ± 0.1  | 27.5 ± 0.3               | 42.8 ± 0.3              | 31.2 ± 0.3              | 42.9 ± 0.2            | 37.9 ± 0.1               | 29.0 ± 0.1               |
| $I(0)$ (cm <sup>-1</sup> ) [from $P(r)$ ]                   | 0.010       | 0.010       | 0.002       | 0.018                    | 0.058                   | 0.024                   | 0.074                 | 0.006                    | 0.015                    |
| $R_g$ (Å) [from $P(r)$ ]                                    | 12.2        | 18.6        | 29.4        | 27.6                     | 42.9                    | 30.9                    | 43.2                  | 38.0                     | 29.0                     |
| $D_{max}$ (Å)                                               | 40.5        | 63.0        | 100.7       | 90.8                     | 149.5                   | 103.3                   | 150.0                 | 124.9                    | 93.6                     |
| Porod estimate (Å <sup>3</sup> )                            | 9662        | 18975       | 95642       | 97094                    | 208344                  | 105951                  | 233153                | 198499                   | 107489                   |
| <b>Molecular-mass determination</b>                         |             |             |             |                          |                         |                         |                       |                          |                          |
| Partial specific volume (cm <sup>3</sup> .g <sup>-1</sup> ) | 0.54        | 0.54        | 0.74        | 0.73                     | 0.71                    | 0.71                    | 0.72                  | 0.71                     | 0.71                     |
| Contrast ( $\Delta\rho \times 10^{10}$ cm <sup>-2</sup> )   | 6.28        | 6.28        | 2.82        | 2.95                     | 3.27                    | 3.27                    | 3.16                  | 3.25                     | 3.25                     |
| Molecular mass $M_r$ from $I(0)$ (Da)                       | 6039        | 10859       | 59776       | 61116                    | 130215                  | 66219                   | 145720                | 124062                   | 67180                    |
| Calculated monomeric $M_r$ from sequence (Da)               | 6732        | 9216        | 61496       | 65034                    | 70635                   | 70635                   | 68228                 | 70441                    | 70441                    |
| <b>Data processing</b>                                      |             |             |             |                          |                         |                         |                       |                          |                          |
| Primary data reduction                                      | FOXTROT     | FOXTROT     | FOXTROT     | FOXTROT                  | FOXTROT                 | FOXTROT                 | FOXTROT               | FOXTROT                  | FOXTROT                  |
| Data processing                                             | PRIMUS      | PRIMUS      | PRIMUS      | PRIMUS                   | US-SOMO                 | US-SOMO                 | US-SOMO               | US-SOMO                  | US-SOMO                  |
| <i>Ab initio</i> analysis                                   | DAMMIF      | DAMMIF      | DAMMIF      | MONSA                    | MONSA                   | MONSA                   | MONSA                 | MONSA                    | MONSA                    |
| Number of models                                            | 50          | 50          | 50          | 32                       | 32                      | 32                      | 32                    | 32                       | 32                       |
| Model $\chi^2$                                              | 1.44 ± 0.01 | 2.09 ± 0.01 | 4.24 ± 0.02 | 1.19 ± 0.01              | 4.13 ± 0.02             | 2.45 ± 0.02             | 1.28 ± 0.01           | 1.61 ± 0.01              | 2.22 ± 0.07              |
| Validation and averaging                                    | DAMAVER     | DAMAVER     | DAMAVER     | DAMAVER                  | DAMAVER                 | DAMAVER                 | DAMAVER               | DAMAVER                  | DAMAVER                  |
| NSD                                                         | 0.55 ± 0.10 | 0.86 ± 0.20 | 0.92 ± 0.19 | 0.65 ± 0.12              | 0.84 ± 0.25             | 0.69 ± 0.10             | 0.66 ± 0.12           | 0.59 ± 0.10              | 0.65 ± 0.12              |
| Rigid-body modeling                                         | HYDROPRO    | HYDROPRO    | EOM         | MODELLER                 | SASREF / EOM            | SASREF / MODELLER       | SASREF / EOM          | SASREF / MODELLER        | SASREF / MODELLER        |
| Computation of model intensities                            | CRY SOL     | CRY SOL     | CRY SOL     | CRY SOL                  | CRY SOL                 | CRY SOL                 | CRY SOL               | CRY SOL                  | CRY SOL                  |
| Model $\chi^2$                                              | 1.47        | 1.34        | 1.16        | 1.23                     | 1.66                    | 2.08                    | 1.85                  | 1.98                     | 1.23                     |

**Table S4.** Summary of physical parameters of SAXS assays

| <b>Sample</b>                   | <b><math>R_g</math> (Å)</b> | <b><math>D_{max}</math> (Å)</b> | <b><math>\chi^2</math></b> |
|---------------------------------|-----------------------------|---------------------------------|----------------------------|
| <b>apo ScPif1p</b>              |                             |                                 |                            |
| Experimental                    | 29.3                        | 100.0                           |                            |
| Crystal structure model         | 27.5                        | 84.2                            | 9.83                       |
| EOM (flexible 2B + 2C)          | 29.4                        | 101.2                           | 1.16                       |
| <b>ScPif1p-GR<sub>11</sub></b>  |                             |                                 |                            |
| Experimental                    | 27.5                        | 89.3                            |                            |
| Crystal structure model         | 27.5                        | 84.2                            | 1.23                       |
| <b>3G4</b>                      |                             |                                 |                            |
| Experimental                    | 12.3                        | 39.0                            |                            |
| PDB 3SC8                        | 12.3                        | 40.2                            | 1.47                       |
| <b>8T3G4</b>                    |                             |                                 |                            |
| Experimental                    | 18.2                        | 63                              |                            |
| model                           | 18.4                        | 64                              | 1.34                       |
| <b>ScPif1p-8T3G4 (monomer)</b>  |                             |                                 |                            |
| Experimental                    | 30.8                        | 93.4                            |                            |
| model                           | 29.6                        | 93.2                            | 2.08                       |
| <b>ScPif1p-8T3G4 (dimer)</b>    |                             |                                 |                            |
| Experimental                    | 42.8                        | 133.7                           |                            |
| Dimer 1 2:2                     | 38.2                        | 144.2                           | 18.6                       |
| Dimer 2 2:2                     | Steric clashes of 3G4       |                                 |                            |
| Dimer 2 2:1                     | 42.7                        | 137.2                           | 1.66                       |
| Dimer 3 2:2                     | 40.8                        | 141.7                           | 5.67                       |
| Dimer 4 2:2                     | 45.3                        | 147.2                           | 4.97                       |
| <b>ScPif1p-3G4 (dimer)</b>      |                             |                                 |                            |
| Experimental                    | 42.9                        | 150.0                           |                            |
| Dimer 2 2:1                     | 43.1                        | 157.7                           | 1.85                       |
| <b>ScPif1p-8T11bp (monomer)</b> |                             |                                 |                            |
| Experimental                    | 29.0                        | 102.0                           |                            |
| model                           | 28.6                        | 109.2                           | 1.23                       |
| <b>ScPif1p-8T11bp (dimer)</b>   |                             |                                 |                            |
| Experimental                    | 37.6                        | 118.4                           |                            |
| Dimer 2 2:1                     | 37.2                        | 111.2                           | 1.98                       |
